# Supplementary material
Source: PubMed Central journal article supplement (PMC4222624)
Supplement: ac5020996_si_001.pdf [file ac5020996_si_001.pdf]

# An LC-SRM Approach for the Separation and Quantitation of Sialylated N-glycans Linkage Isomers

Shujuan Tao<sup>1</sup>, Yining Huang<sup>1</sup>, Barry E. Boyes<sup>1,2</sup> and Ron Orlando<sup>1\*</sup>

<sup>1</sup>Complex Carbohydrate Research Center, University of Georgia, Athens, GA 30602, USA

<sup>2</sup>Advanced Materials Technology Inc, Wilmington, DE 19810, USA

\*Corresponding author: Complex Carbohydrate Research Center, 315 Riverbend Road, Athens, GA 30602, Tel: (706) 542-4429, Fax: (706) 542-4412, email: [orlando@ccrc.uga.edu](mailto:orlando@ccrc.uga.edu)

## Supporting Information

### List of Figures

|                                                                                         |   |
|-----------------------------------------------------------------------------------------|---|
| Figure S-1: [Sialidase S digestions for Tri-2SA fractions by SRM detection] .....       | 2 |
| Figure S-2: [Sialidase S digestions for Tri-3SA fractions by SRM detection] .....       | 3 |
| Figure S-3: [Sialidase S digestions for Tri-4SA fractions by SRM detection] .....       | 4 |
| Figure S-4: [Diagram of Branching/linkage Isoforms] .....                               | 5 |
| Table S-1: [SRM transitions for Sialidase S digestion of fetuin N-glycan studies] ..... | 6 |
| Table S-2: [P-Values obtained from Independent Two-Tailed Students T-test] .....        | 7 |

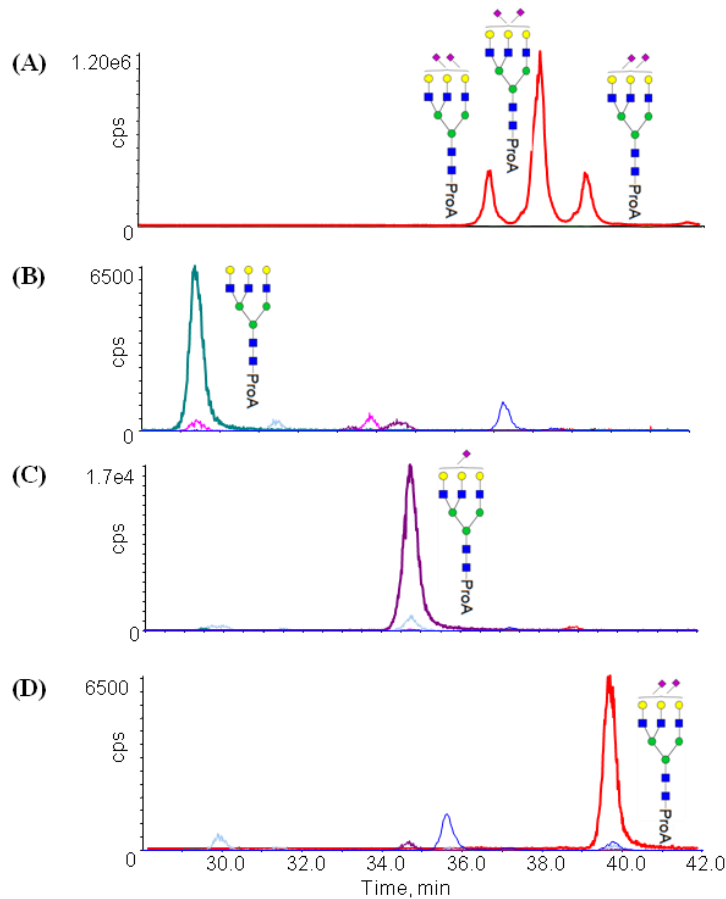

**Figure S-1.** Sialidase S digestions for Tri-2SA fractions by SRM detection. **(A)** LC-SRM trace for Tri-2SA (m/z at 936.9) from analysis of the fetuin N-glycans. LC-SRM analysis illustrates **(B)** the disappearance of the red peak (Tri-2SA) and the appearance of the dark blue peak (Tri-0SA) after Sialidase S digestion for the first fraction; **(C)** the disappearance of the red peak (Tri-2SA) and the appearance of the purple peak (Tri-SA) after Sialidase digestion for the second fraction; and **(D)** no change of the red peak (Tri-2SA) after Sialidase S digestion for the third fraction. **Figures B-D** contain SRM traces for all three possible glycans resulting from this treatment, i.e., the Tri-0SA, Tri-SA and Tri-2SA, however the low levels make these difficult to see in all of the figures.

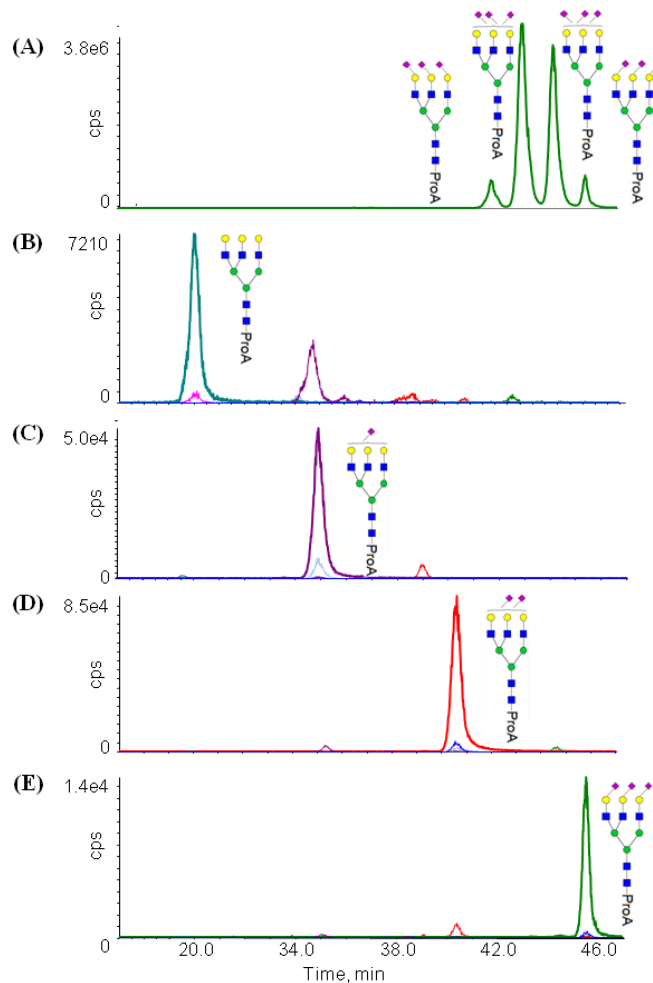

**Figure S-2.** Sialidase S digestions for Tri-3SA fractions by SRM detection. **(A)** LC-SRM trace for Tri-3SA ( $m/z$  at 1033.9) from analysis of the fetuin N-glycans. LC-SRM analysis illustrates **(B)** the disappearance of the green peak (Tri-3SA) and the appearance of the dark blue peak (Tri-0SA) after Sialidase S digestion for the first fraction; **(C)** the disappearance of the green peak (Tri-3SA) and the appearance of the purple peak (Tri-SA) after Sialidase S digestion for the second fraction; **(D)** the disappearance of the green peak (Tri-3SA) and the appearance of the red peak (Tri-2SA) after Sialidase S digestion for the third fraction; and **(E)** no change of the green peak (Tri-3SA) after Sialidase S digestion for the fourth fraction. **Figures B-E** contain SRM traces for all four possible glycans resulting from this treatment, i.e., the Tri-0SA, Tri-SA, Tri-2SA and Tri-3SA, however the low levels make these difficult to see in all of the figures.

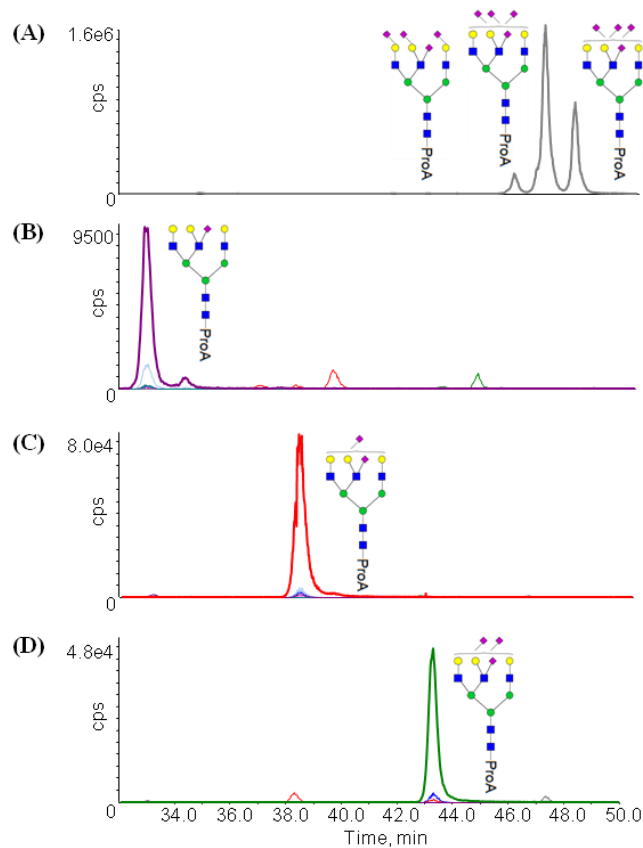

**Figure S-3.** Sialidase S digestions for Tri-4SA fractions by SRM detection. **(A)** LC-SRM trace for Tri-4SA(m/z at 1130.9) from analysis of the fetuin N-glycans. LC-SRM analysis illustrates **(B)** the disappearance of the grey peak (Tri-4SA) and the appearance of the purple peak (Tri-SA) after Sialidase S digestion for the first fraction; **(C)** the disappearance of the grey peak (Tri-4SA) and the appearance of the red peak (Tri-2SA) after Sialidase S digestion for the second fraction; and **(D)** the disappearance of the grey peak (Tri-4SA) and the appearance of the green peak (Tri-3SA) after Sialidase S digestion for the third fraction. Figures B-D contain SRM traces for all five possible glycans resulting from this treatment, i.e., the Tri-0SA, Tri-SA, Tri-2SA, Tri-3SA and Tri-4SA, however the low levels make these difficult to see in all of the figures.

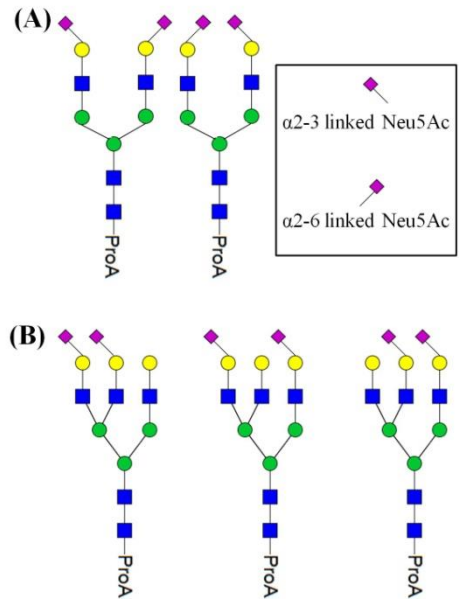

**Figure S-4.** Branching isoforms. **(A)** Two isomeric structures for Bi-2SA(3,6) glycans; **(B)** Three isomeric structures for Tri-2SA(3,3) glycans.

**Table S-1.** N-glycans Detected in the Fetuin Sample.

| <b>Group</b> | <b>Observed <math>m/z</math><br/>(charge)</b> | <b>Theoretical <math>m/z</math><br/>(charge)</b> | <b>Composition</b> | <b>Peak No.</b> |
|--------------|-----------------------------------------------|--------------------------------------------------|--------------------|-----------------|
| I            | 1222.1 (+2)                                   | 1222.06 (+2)                                     | Bi-2SA             | 1, 2, 4         |
| II           | 1259.2 (+2)                                   | 1259.08 (+2)                                     | Tri-SA             | 3               |
| III          | 936.9 (+3)                                    | 936.75 (+3)                                      | Tri-2SA            | 5, 6, 8         |
| IV           | 1367.8 (+2)                                   | 1367.60 (+2)                                     | Bi-3SA             | 7, 9            |
| V            | 1033.9 (+3)                                   | 1033.78 (+3)                                     | Tri-3SA            | 10, 11, 13, 15  |
| VI           | 1155.9 (+3)                                   | 1155.49 (+3)                                     | Tetra-3SA          | 12, 14          |
| VII          | 1130.9 (+3)                                   | 1130.81(+3)                                      | Tri-4SA            | 16, 17, 19      |
| VIII         | 1252.9 (+3)                                   | 1252.52 (+3)                                     | Tetra-4SA          | 18, 20, 21      |

**Table S-2.** SRM transitions for Sialidase S digestion of fetuin N-glycan studies.

| <b>Composition</b> | <b>Q1 (charge)</b> | <b>Q3 (charge)</b> | <b>CE (V)</b> | <b>Dwell (msec)</b> |
|--------------------|--------------------|--------------------|---------------|---------------------|
| Bi-0SA             | 931.1 (+2)         | 441.4 (+1)         | 70            | 100                 |
| Bi-SA              | 1076.5 (+2)        | 441.4 (+1)         | 70            | 100                 |
| Bi-2SA             | 1222.1 (+2)        | 441.4 (+1)         | 70            | 100                 |
| Tri-0SA            | 1113.7 (+2)        | 441.4 (+1)         | 70            | 100                 |
| Tri-SA             | 1259.2 (+2)        | 441.4 (+1)         | 70            | 100                 |
| Tri-2SA            | 936.9 (+3)         | 441.4 (+1)         | 70            | 100                 |
| Tri-3SA            | 1033.9 (+3)        | 441.4 (+1)         | 70            | 100                 |
| Tri-4SA            | 1130.9 (+3)        | 441.4 (+1)         | 70            | 100                 |

**Table S-3.** P-Values obtained from Independent Two-Tailed Students T-test of the difference between the relative quantitation using UV and SRM detection when **(I)** the response for each glycoform is calculated relative to the summed response for all identified glycans and **(II)** the response for each glycoform is calculated relative to the summed response for all glycoforms with the same composition.

|                  | <b>P-Value</b> | <b>P-Value</b> |
|------------------|----------------|----------------|
| Bi-2SA(3,3)      | <b>1.0E-05</b> | 0.5113         |
| Bi-2SA(3,6)      | <b>8.7E-05</b> | 0.3489         |
| Bi-2SA(6,6)      | <b>3.9E-05</b> | 0.0916         |
| Tri-2SA(3,3)     | <b>5.5E-04</b> | 0.3409         |
| Tri-2SA(3,6)     | <b>8.1E-04</b> | 0.4050         |
| Tri-2SA(6,6)     | <b>0.0021</b>  | 0.6826         |
| Tri-3SA(3,3,3)   | 0.2697         | 0.9177         |
| Tri-3SA(3,3,6)   | <b>6.0E-05</b> | 0.5113         |
| Tri-3SA(3,6,6)   | 0.0146         | 0.0519         |
| Tri-3SA(6,6,6)   | <b>0.0044</b>  | 0.2180         |
| Tri-4SA(3,3,3,6) | <b>2.8E-05</b> | 0.0428         |
| Tri-4SA(3,3,6,6) | <b>2.2E-05</b> | 0.0594         |
| Tri-4SA(3,6,6,6) | <b>3.2E-05</b> | 0.0065         |

**Bold values are significant at  $P \leq 0.001$ .**
